# Supplementary material for: Persistent Activation of Innate Immunity in Patients with Primary Antibody Deficiencies
Source: Hindawi journal article supplement (doi:10.1155/2020/8317671), 2020-01-01
Supplement: f1 [file 8317671.f1.pdf]

# Supplementary Material

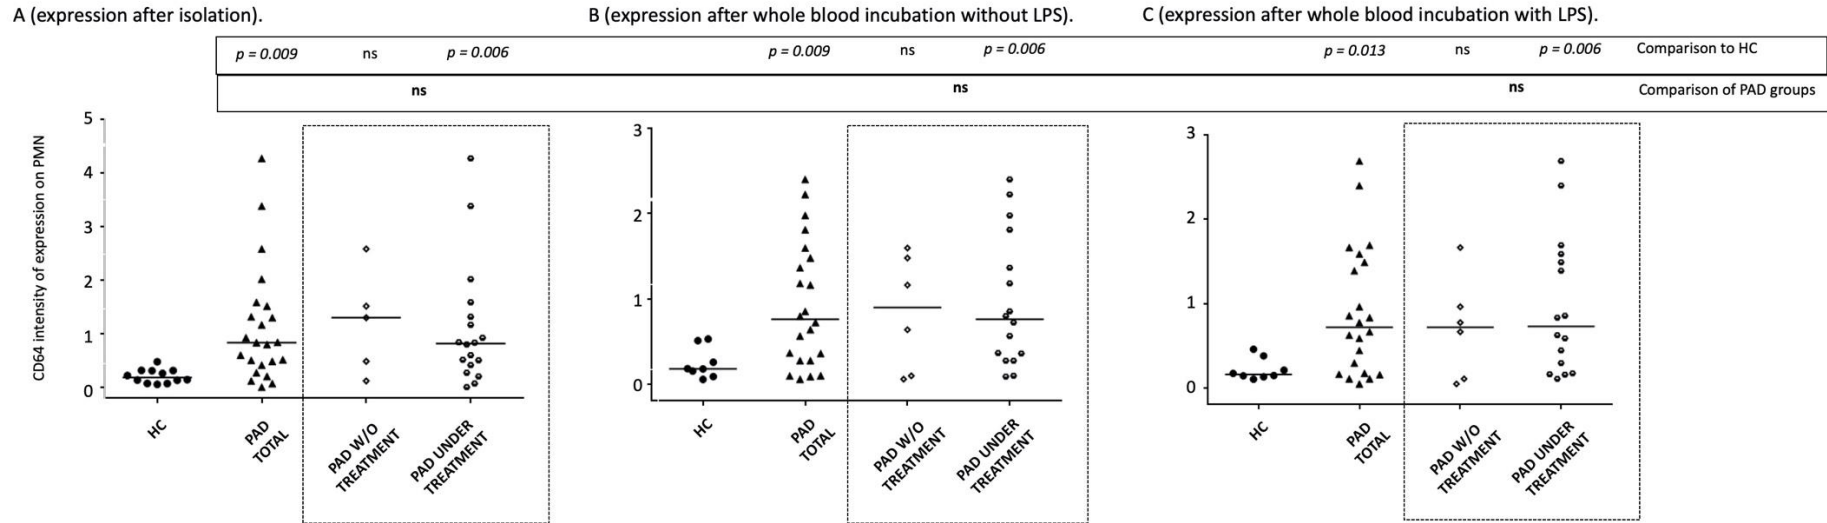

**Supplementary Figure 1.** CD64 intensity of expression on polymorphonuclear cells (PMN) in different experimental conditions in the patients and controls of the study: A. after PMN isolation, B. after whole blood incubation without LPS, C. after whole blood incubation with LPS of total PAD patients. The lines represent the median values. Statistical analyses were performed by Mann-Whitney U test; \* : when  $p < 0.05$ ; \*\* : when  $p < 0.01$ ; ns: not significant

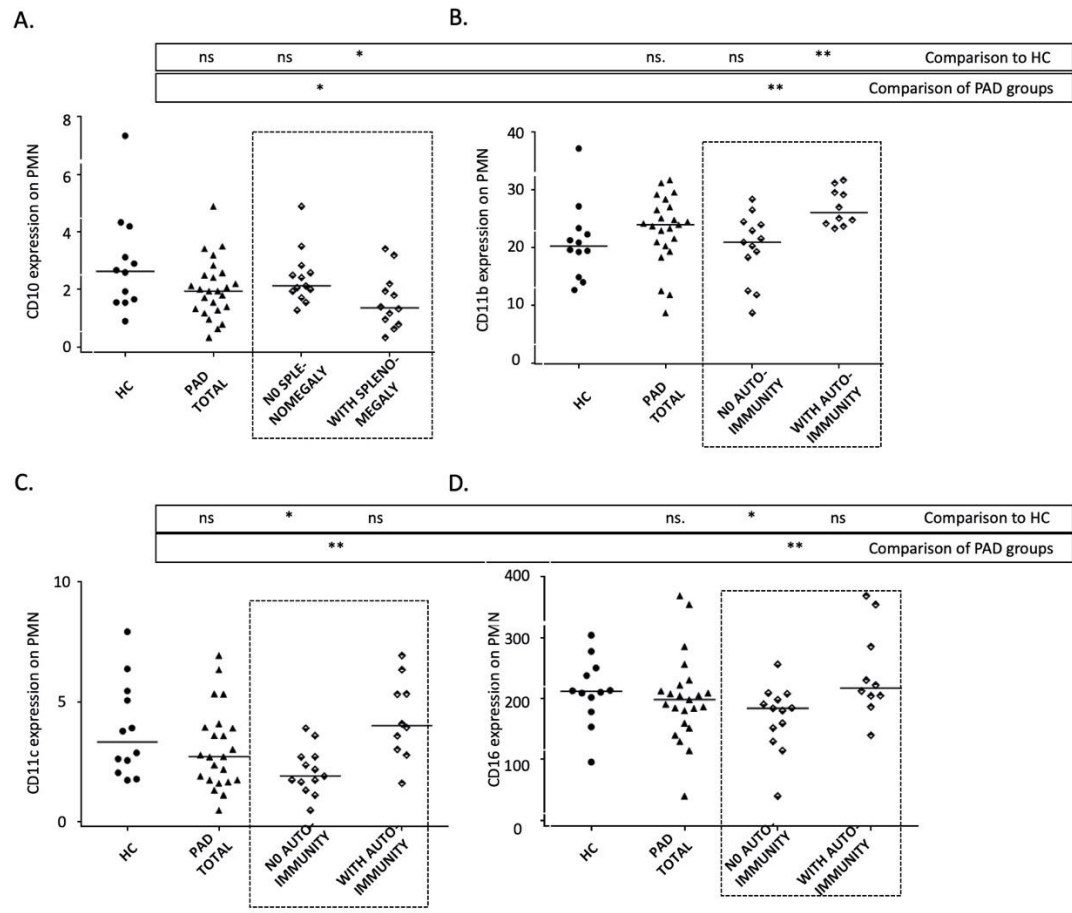

**Supplementary Figure 2.** A. CD10 intensity of expression on polymorphonuclear cells (PMN) at basal state according to the presence of splenomegaly. B. CD11b, C. CD11c and D. CD16 intensity of expression on PMN after their isolation, according to the presence of autoimmunity. The lines represent the median values. Statistical analyses were performed by Mann-Whitney U test; \* : when  $p < 0.05$ ; \*\* : when  $p < 0.01$ ; ns: not significant

**Supplementary Table 1.** Demographic, genetic and clinical data of PAD patients of the study

| No | Patient           | Treatment status          | Sex | Age | Mutational status    | Autoimmunity | CRD | Bronchiectasis | Enteropathy | Granulomas | Neoplasia | Splenomegaly |
|----|-------------------|---------------------------|-----|-----|----------------------|--------------|-----|----------------|-------------|------------|-----------|--------------|
| 1  | D.K.              | NO treatment              | M   | 14  | <b>IKZF1-p.H191Y</b> | no           | no  | no             | no          | no         | no        | no           |
| 2  | H.A.              | NO treatment              | M   | 48  | Unknown              | no           | yes | yes            | no          | no         | no        | no           |
| 3  | K.M.^             | NO treatment              | F   | 53  | Unknown              | no           | no  | no             | yes         | no         | no        | no           |
| 4  | M.M. <sup>^</sup> | NO treatment              | F   | 43  | Unknown              | yes          | yes | yes            | no          | no         | no        | splenectomy  |
| 5  | S.M.^             | NO treatment              | F   | 66  | Unknown              | no           | no  | yes            | yes         | no         | no        | no           |
| 6  | T.D.^             | NO treatment              | F   | 43  | Unknown              | yes          | no  | no             | no          | no         | yes       | yes          |
| 7  | A.A.              | fSCIG                     | M   | 48  | Unknown              | no           | yes | yes            | no          | no         | no        | no           |
| 8  | D.M.              | fSCIG                     | F   | 38  | Unknown              | no           | no  | no             | no          | yes        | no        | yes          |
| 9  | T.H.              | IVIG                      | F   | 40  | Unknown              | no           | no  | yes            | no          | yes        | no        | yes          |
| 10 | K.A.              | fSCIG                     | F   | 34  | Unknown              | no           | no  | no             | yes         | no         | no        | yes          |
| 11 | K.M.              | fSCIG                     | F   | 36  | Unknown              | yes          | no  | no             | yes         | no         | no        | no           |
| 12 | K.B.              | fSCIG                     | F   | 56  | Unknown              | no           | yes | yes            | no          | no         | no        | no           |
| 13 | K.Z.              | fSCIG                     | F   | 65  | Unknown              | no           | yes | no             | no          | yes        | no        | no           |
| 14 | K.M.              | fSCIG                     | F   | 39  | Unknown              | no           | no  | yes            | no          | no         | no        | yes          |
| 15 | K.M.              | IVIG                      | M   | 51  | <b>TACI-p.C104R</b>  | yes          | no  | yes            | yes         | yes        | yes       | splenectomy  |
| 16 | K.S.              | fSCIG                     | M   | 28  | Unknown              | yes          | yes | no             | no          | no         | no        | yes          |
| 17 | M.D.              | fSCIG                     | F   | 19  | <b>CTLA4-p.Y89X</b>  | yes          | no  | no             | yes         | no         | no        | no           |
| 18 | B.K.              | fSCIG                     | F   | 49  | Unknown              | yes          | no  | yes            | no          | no         | no        | no           |
| 19 | N.B.              | IVIG                      | F   | 58  | Unknown              | no           | no  | no             | no          | no         | no        | yes          |
| 20 | N.E.              | IVIG                      | F   | 42  | Unknown              | no           | yes | yes            | no          | no         | no        | yes          |
| 21 | S.N.              | fSCIG                     | M   | 30  | <b>TACI-p.C104R</b>  | yes          | yes | yes            | no          | no         | no        | yes          |
| 22 | F.I.*             | fSCIG                     | M   | 23  | <b>CTLA4-p.Y139C</b> | yes          | no  | no             | no          | no         | no        | splenectomy  |
| 23 | M.E.              | fSCIG (low CS dosage)     | F   | 38  | Unknown              | no           | yes | yes            | no          | no         | no        | yes          |
| 24 | P.A.              | fSCIG (and mycophenolate) | M   | 21  | Unknown              | yes          | no  | no             | no          | yes        | no        | yes          |
| 25 | M.D.              | fSCIG                     | M   | 51  | <b>TACI-p.C104R</b>  | yes          | no  | no             | no          | no         | no        | yes          |

**Abbreviations:** M, male; F, female; CRD, chronic respiratory disease; fSCIG, facilitated subcutaneous immunoglobulin; IVIG, intravenous immunoglobulin; SCIG, subcutaneous immunoglobulin

^ Patients 3-6 were also analyzed after the initiation of replacement treatment (see Materials and Methods section for details)

\* Patient FL carried also the mutation *JAK3*-p.R840C (Ref. 21, *Frontiers in Immunology* 2017;8:1824)

**Supplementary Table 2. Monocyte counts and subpopulations in the patients and controls of the study**

| <b>A. MONOCYTES<br/>SUBPOPULATIONS<br/>(%)</b> |                      |                       |                         | <b>HC vs<br/>PAD</b> | <b>HC vs SEPSIS</b> | <b>PAD VS SEPSIS</b> |
|------------------------------------------------|----------------------|-----------------------|-------------------------|----------------------|---------------------|----------------------|
|                                                | <b>HC<br/>(n=12)</b> | <b>PAD<br/>(n=25)</b> | <b>SEPSIS<br/>(n=4)</b> | <b>p</b>             | <b>p</b>            | <b>p</b>             |
| <b>Classical</b> (mean, SDEV)                  | 78.1 ± 17.3          | 65.6 ± 16.0           | 62.9 ± 16.5             | <b>0.018</b>         | 0.133               | 0.818                |
| <b>Intermediate</b> (mean, SDEV)               | 14.6 ± 14.1          | 24.7 ± 14.6           | 29.6 ± 17.0             | <b>0.018</b>         | 0.103               | 0.584                |
| <b>Non clascal</b> (mean, SDEV)                | 6.1 ± 4.0            | 8.1 ± 3.8             | 6.8 ± 4.0               | 0.106                | 0.684               | 0.671                |

| <b>B. MONOCYTES<br/>SUBPOPULATIONS<br/>(x10<sup>9</sup>/L of Whole Blood)</b> |               |               |               | <b>HC vs<br/>PAD</b> | <b>HC vs<br/>SEPSIS</b> | <b>PAD VS<br/>SEPSIS</b> |
|-------------------------------------------------------------------------------|---------------|---------------|---------------|----------------------|-------------------------|--------------------------|
|                                                                               | <b>HC</b>     | <b>PAD</b>    | <b>SEPSIS</b> | <b>p</b>             | <b>p</b>                | <b>p</b>                 |
| <b>Monocytes total count</b><br>(mean, SDEV)                                  | 0.305 ± 0.123 | 0.375 ± 0.245 | 0.325 ± 0.206 | 0.772                | 0.932                   | 0.825                    |
| <b>Classical</b> (mean, SDEV)                                                 | 0.247 ± 0.105 | 0.263 ± 0.215 | 0.179 ± 0.083 | 0.402                | 0.262                   | 0.865                    |
| <b>Intermediate</b> (mean, SDEV)                                              | 0.035 ± 0.025 | 0.080 ± 0.050 | 0.120 ± 0.109 | <b>0.010</b>         | 0.262                   | 0.542                    |
| <b>Non clascal</b> (mean, SDEV)                                               | 0.018 ± 0.013 | 0.026 ± 0.016 | 0.021 ± 0.023 | 0.185                | >0.999                  | 0.382                    |

Abbreviations: HC, healthy controls, PAD, primary antibody deficiencies; PMN, polymorphonuclear cells; SDEV, standard deviation. Statistical analysis was performed by Mann-Whitney U-test. Statistical analysis was performed by Mann-Whitney U-test, while *p* refers to comparison of PAD patients vs HC, Sepsis patients vs HC and PAD patients vs Sepsis patients.

**Supplementary Table 3. Expression of surface markers on PMN at basal state**

| Markers                                               | HC<br>(n 12) | Patients with<br>sepsis (n 4) | PAD patients<br>(n 25) | <i>p</i> 1        | <i>p</i> 2   |
|-------------------------------------------------------|--------------|-------------------------------|------------------------|-------------------|--------------|
| Absolute number<br>(x10 <sup>9</sup> /L) (mean, SDEV) | 4.5 ± 1.8    | 9.3 ± 2.8                     | 4.5 ± 2.5              | 0.586             | <b>0.011</b> |
| CD16 (mean, SDEV)                                     | 175.6 ± 41.7 | 81.6 ± 32.0                   | 153.7 ± 43.0           | 0.052             | <b>0.004</b> |
| CD18 (mean, SDEV)                                     | 9.2 ± 4.3    | 10.9 ± 4.9                    | 9.7 ± 4.3              | 0.747             | 0.684        |
| CD11b (mean, SDEV)                                    | 15.6 ± 7.0   | 14.9 ± 3.9                    | 16.4 ± 4.9             | 0.336             | 0.951        |
| CD66b (mean, SDEV)                                    | 5.6 ± 1.5    | 12.6 ± 5.9                    | 6.2 ± 2.1              | 0.387             | <b>0.002</b> |
| CD64 (mean, SDEV)                                     | 0.2 ± 0.1    | 1.8 ± 1.3                     | 1.0 ± 0.7              | <b>&lt; 0.001</b> | <b>0.001</b> |
| CD10 (mean, SDEV)                                     | 2.9 ± 1.8    | 0.9 ± 0.9                     | 2.0 ± 1.0              | 0.160             | <b>0.019</b> |
| CD11c (mean, SDEV)                                    | 2.2 ± 1.2    | 1.9 ± 1.0                     | 1.7 ± 1.0              | 0.195             | 0.782        |

Abbreviations: HC, healthy controls, PAD, primary antibody deficiencies; PMN, polymorphonuclear cells; SDEV, standard deviation. Statistical analysis was performed by Mann-Whitney U-test, while *p*1 refers to comparison of PAD patients vs HC and *p*2 refers to the comparison of sepsis patients vs HC.

**Supplementary Table 4. Expression of surface markers on PMN after isolation**

| Markers            | HC<br>(n 12) | PAD patients<br>(n 23) | <i>p</i>          |
|--------------------|--------------|------------------------|-------------------|
| CD16 (mean, SDEV)  | 212.1 ± 54.9 | 200.7 ± 71.1           | 0.293             |
| CD18 (mean, SDEV)  | 14.4 ± 7.7   | 16.2 ± 7.6             | 0.493             |
| CD11b (mean, SDEV) | 21.0 ± 6.5   | 23.0 ± 6.0             | 0.139             |
| CD66b (mean, SDEV) | 9.1 ± 2.8    | 8.5 ± 4.1              | 0.716             |
| CD64 (mean, SDEV)  | 0.2 ± 0.1    | 1.1 ± 1.1              | <b>&lt; 0.001</b> |
| CD10 (mean, SDEV)  | 5.7 ± 2.4    | 4.6 ± 2.3              | 0.151             |
| CD11c (mean, SDEV) | 3.8 ± 2.0    | 3.1 ± 1.7              | 0.262             |

Abbreviations: HC, healthy controls, PAD, primary antibody deficiencies; PMN, polymorphonuclear cells. Statistical analysis was performed by Mann-Whitney U-test, while *p* refers to comparison of PAD patients vs HC.

**Supplementary Table 5. Expression of surface markers on PMN after incubation without LPS**

| Markers            | HC<br>(n 12) | PAD patients<br>(n 25) | <i>p</i>     |
|--------------------|--------------|------------------------|--------------|
| CD16 (mean, SDEV)  | 214.2 ± 38.5 | 174.6 ± 61.0           | <b>0.012</b> |
| CD18 (mean, SDEV)  | 12.5 ± 7.1   | 12.5 ± 6.1             | 0.736        |
| CD11b (mean, SDEV) | 35.3 ± 5.8   | 36.1 ± 10.1            | 0.630        |
| CD66b (mean, SDEV) | 11.1 ± 3.3   | 12.0 ± 6.5             | 0.783        |
| CD64 (mean, SDEV)  | 0.2 ± 0.2    | 0.9 + 0.7              | <b>0.009</b> |
| CD10 (mean, SDEV)  | 4.4 ± 1.5    | 3.6 ± 1.8              | 0.393        |

Abbreviations: HC, healthy donors, LPS, lipopolysaccharides; PAD, primary antibody deficiencies; PMN, polymorphonuclear cells. Statistical analysis was performed by Mann-Whitney U-test, while *p* refers to comparison of PAD patients vs HC.

**Supplementary Table 6. Expression of surface markers on PMN after incubation with LPS**

| Markers            | HC<br>(n 12) | PAD patients<br>(n 25) | <i>p</i>     |
|--------------------|--------------|------------------------|--------------|
| CD16 (mean, SDEV)  | 96.3 ± 34.8  | 102.5 ± 44.4           | 0.723        |
| CD18 (mean, SDEV)  | 14.2 ± 6.8   | 13.5 ± 5.8             | 0.266        |
| CD11b (mean, SDEV) | 60.0 ± 5.7   | 59.1 ± 15.3            | 0.630        |
| CD66b (mean, SDEV) | 39.3 ± 18.4  | 34.3 ± 18.0            | 0.431        |
| CD64 (mean, SDEV)  | 0.2 ± 0.1    | 0.9 + 0.8              | <b>0.013</b> |
| CD10 (mean, SDEV)  | 4.3 ± 1.1    | 3.3 ± 1.7              | 0.107        |

Abbreviations: HC, healthy donors, LPS, lipopolysaccharides; PAD, primary antibody deficiencies; PMN, polymorphonuclear cells. Statistical analysis was performed by Mann-Whitney U-test, while *p* refers to comparison of PAD patients vs HC.
